# Supplementary material for: The conserved DNMT1-dependent methylation regions in human cells are vulnerable to neurotoxicant rotenone exposure
Source: PubMed Central journal article supplement (PMC7076959; doi:10.1186/s13072-020-00338-8), 2020-03-16
Supplement: 13072_2020_338_MOESM1_ESM.pdf [file 13072_2020_338_MOESM1_ESM.pdf]

**Supplementary:**

**Table S1. qRT-PCR primers for RNAseq validation in human cells**

|            |                         |
|------------|-------------------------|
| PPFIA4_For | CTCTGCGGATGTTGTCTCCC    |
| PPFIA4_Rev | ATGCTGCCACTGGTTACACG    |
| DNAAF3-For | GGGCTCAAGTCATTCACCCC    |
| DNAAF3-Rev | GGTTGGGCACATGATAGGC     |
| LRR8D-For  | ATGACATTCAGCCAACTTACCG  |
| LRR8D-Rev  | TACTGGCAAACAGACCACCTG   |
| ADRA2C-For | GCCTCAACGACGAGACCTG     |
| ADRA2C-Rev | CCCAGCCCGTTTTTCGGTAG    |
| EML2-For   | CTCCGTAGCCGTGCTATACAG   |
| EML2-Rev   | CCAAGCATTTGATGTCATCGTTG |
| HCN2-For   | AGAAGGGCATTGACTCCGAG    |
| HCN2-Rev   | TAGCGGATCAGGCGTGAGA     |
| NEFM-For   | GCTCGTCATTTGCGCGAATAC   |
| NEFM-Rev   | TTTCTGTACGCAGCGATTTCTAT |
| GAPDH-For  | ACAACCTTTGGTATCGTGGAAGG |
| GAPDH-Rev  | GCCATCACGCCACAGTTTC     |

**Table S2. BS-PCR primers for amplicon sequencing in human cells**

|          |                             |
|----------|-----------------------------|
| HCN2-For | TGAGATTATTTTGGTTAATATGGTGAA |
| HCN2-Rev | CAAAAAAATAAAATTCTTCTTACCTAC |
| NEFM-For | GGTATTAAGGAGTTTTTGGAG       |
| NEFM-Rev | CTAACCTAACCATCCCATCTAAAC    |

**Table S3. Gene Ontology cell component enrichment analysis**

| GO Term    | Cellular Component | Gene Ratio | FDR   |
|------------|--------------------|------------|-------|
| GO:0005886 | plasma<br>membrane | 0.008      | 0.024 |
| GO:0098793 | presynapse         | 0.023      | 0.028 |

**Table S4. CpG Methylation *HCN2***

| CpG site | q-value | $\Delta$ me |
|----------|---------|-------------|
| 42       | 6.8E-18 | -7.0        |
| 54       | 5.4E-06 | -2.6        |
| 58       | 3.3E-04 | -1.8        |
| 78       | 1.7E-04 | -1.7        |
| 140      | 8.3E-19 | -3.9        |
| 142      | 3.6E-13 | -3.3        |
| 160      | 2.5E-25 | -6.0        |
| 164      | 7.6E-17 | -5.0        |
| 180      | 3.0E-13 | -4.9        |

|     |         |      |
|-----|---------|------|
| 364 | 5.0E-05 | -1.2 |
| 406 | 2.3E-04 | 1.0  |
| 420 | 1.2E-12 | 1.7  |
| 444 | 5.4E-06 | 1.5  |
| 450 | 2.1E-08 | -2.7 |

**Table S5. CpG Methylation *NEFM***

| CpG site | q-value | $\Delta$ me |
|----------|---------|-------------|
| 5        | 6.0E-10 | 1.6         |
| 11       | 3.2E-09 | -1.2        |
| 77       | 7.8E-78 | -1.6        |
| 89       | 7.6E-24 | 1.1         |
| 92       | 8.6E-75 | -2.0        |
| 96       | 2.4E-83 | -2.3        |
| 134      | 3.4E-36 | -1.4        |
| 157      | 2.7E-34 | 1.6         |
| 169      | 2.9E-22 | -1.0        |
| 207      | 7.7E-37 | 2.7         |
| 388      | 4.0E-04 | -2.6        |
| 407      | 2.7E-03 | 2.1         |
| 417      | 9.5E-11 | 5.2         |

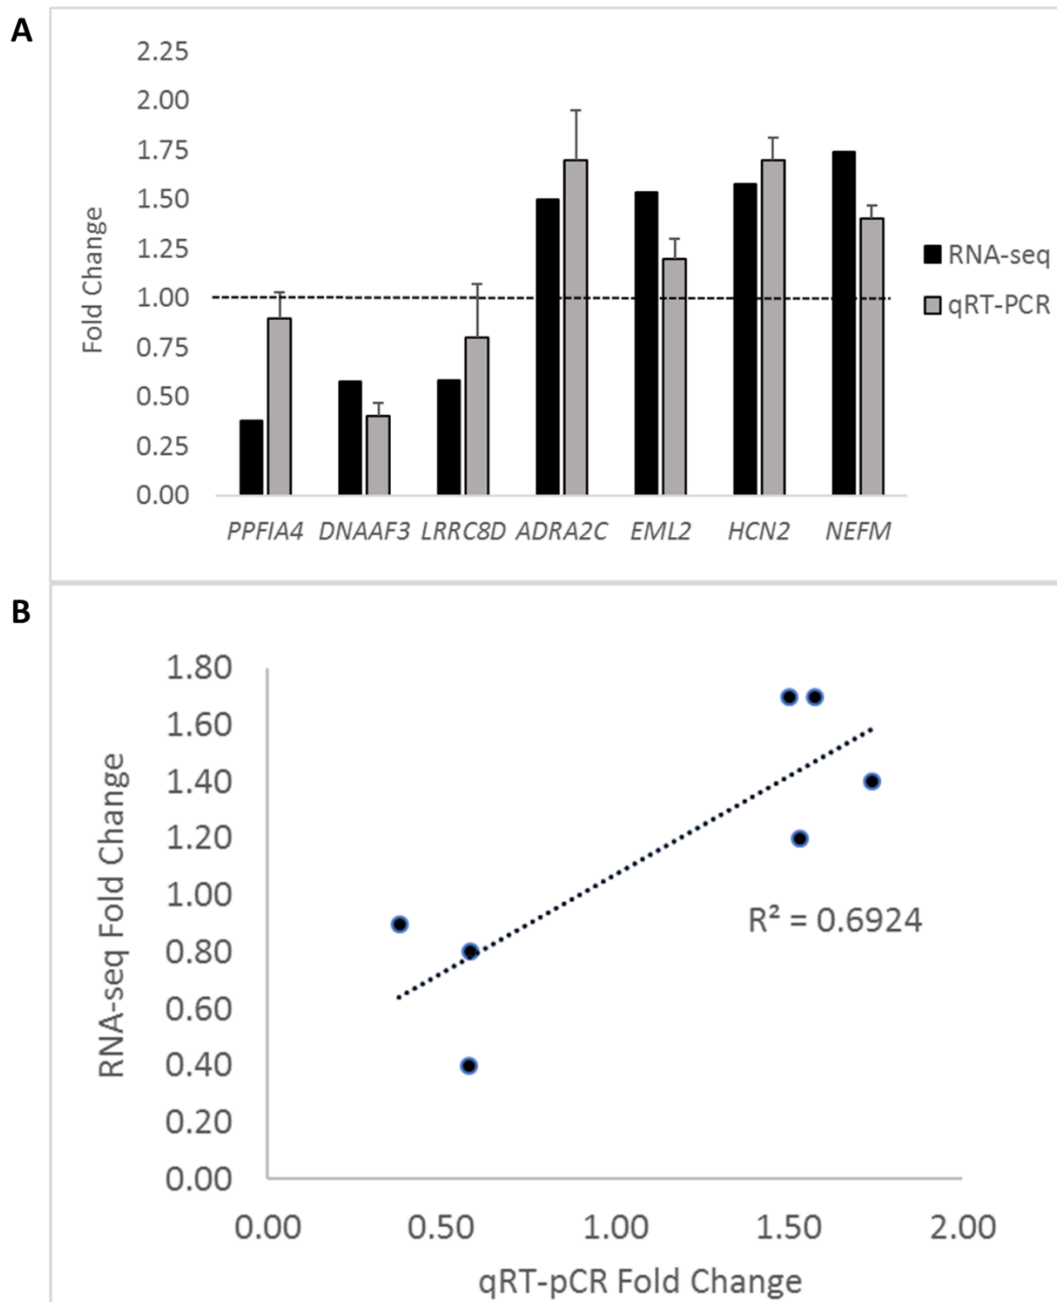

**Figure S1. RNA sequencing validation with qRT-PCR.** A) Fold change comparison of RNA sequencing results versus qRT-PCR results. B) Linear calibration curve of RNA sequencing results with qRT-PCR results expressed as fold change in expression.

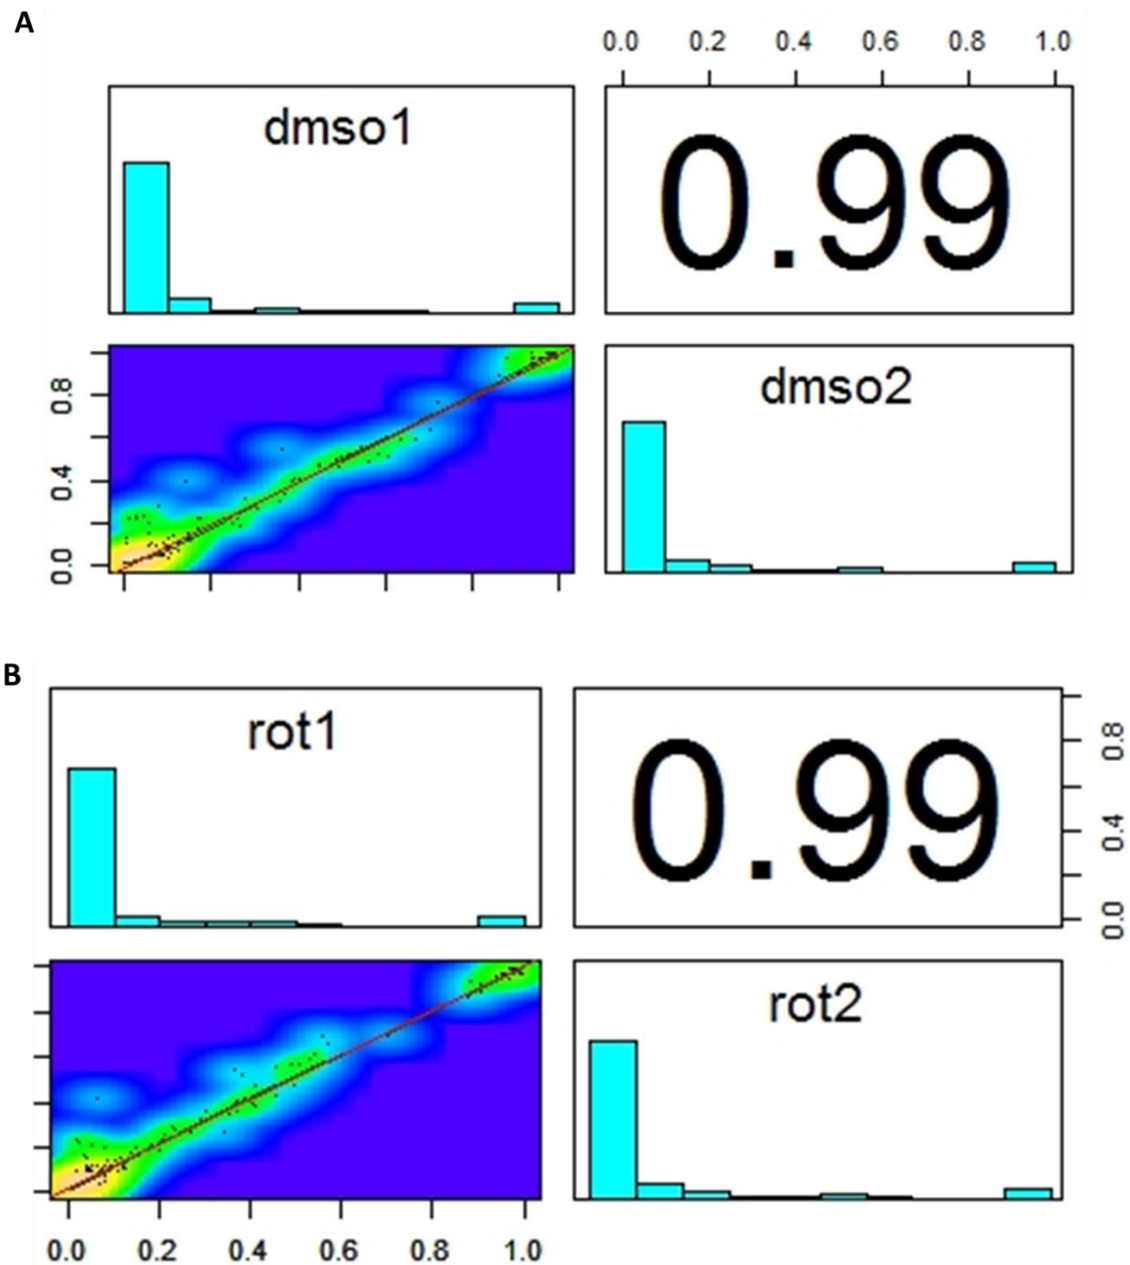

**Figure S2. Pearson's correlation coefficient for bisulfite sequencing replicates of HEK293.** A) Correlation coefficients of Bisulfite sequencing data between biological replicates of control samples. B) Correlation coefficients of Bisulfite sequencing data between biological replicates of rotenone treated samples.

**A**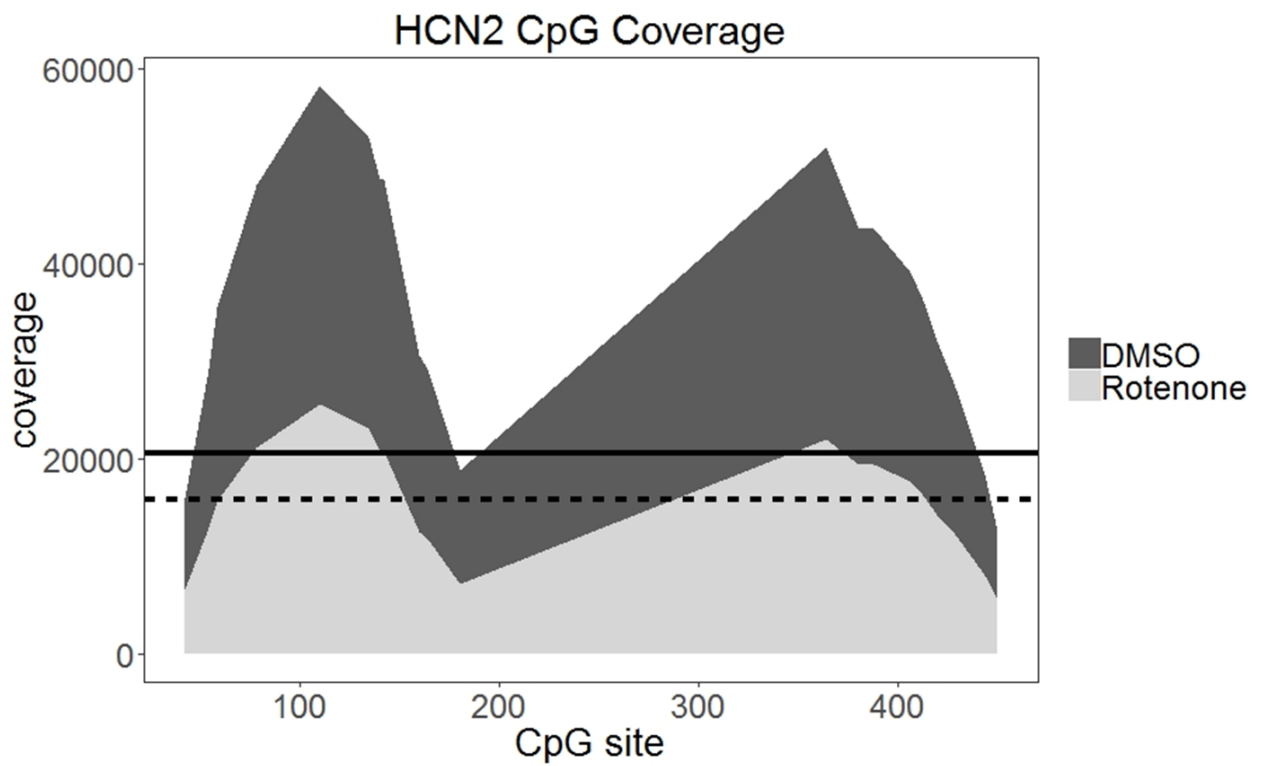**B**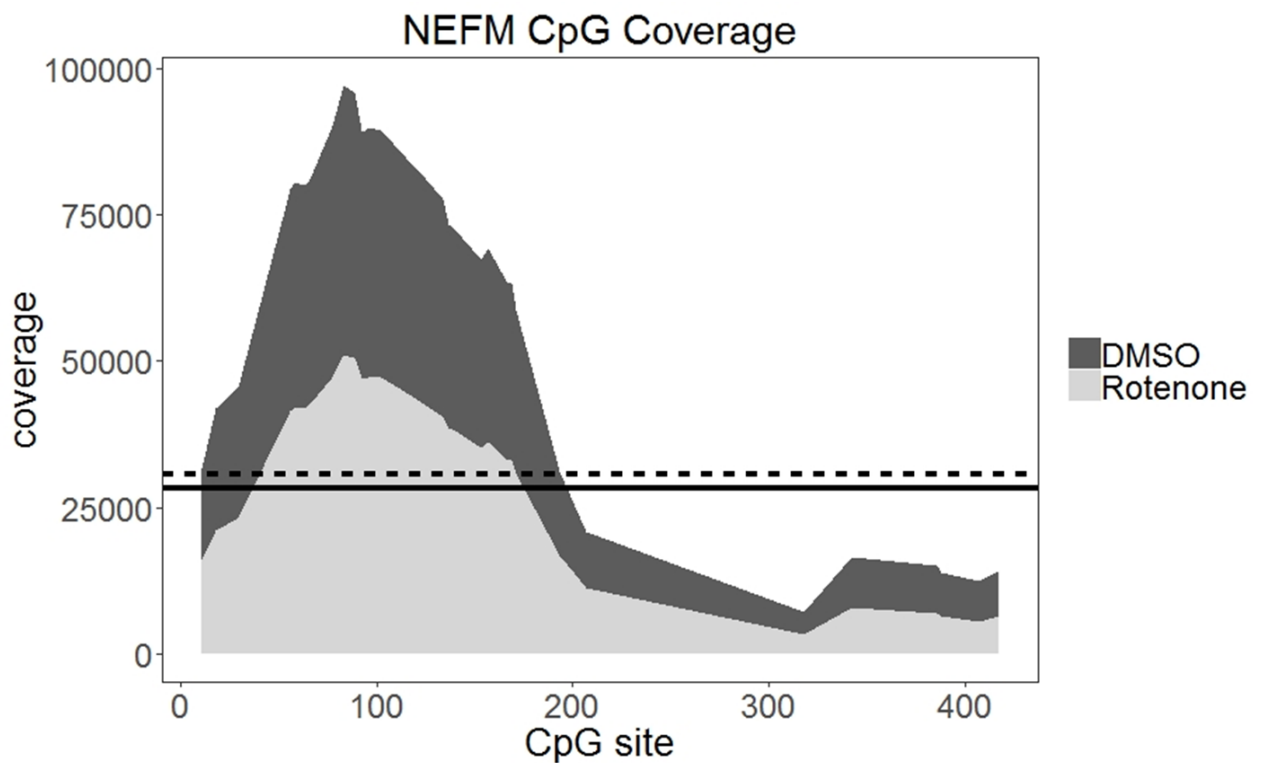

**Figure S3. Bisulfite sequencing coverage of CpG sites within amplified DNMT1-dependent regions at *HCN2* and *NEFM*.** The average total coverage for all CpG sites within the amplified region is indicated by the straight line for DMSO and the dash line for rotenone.

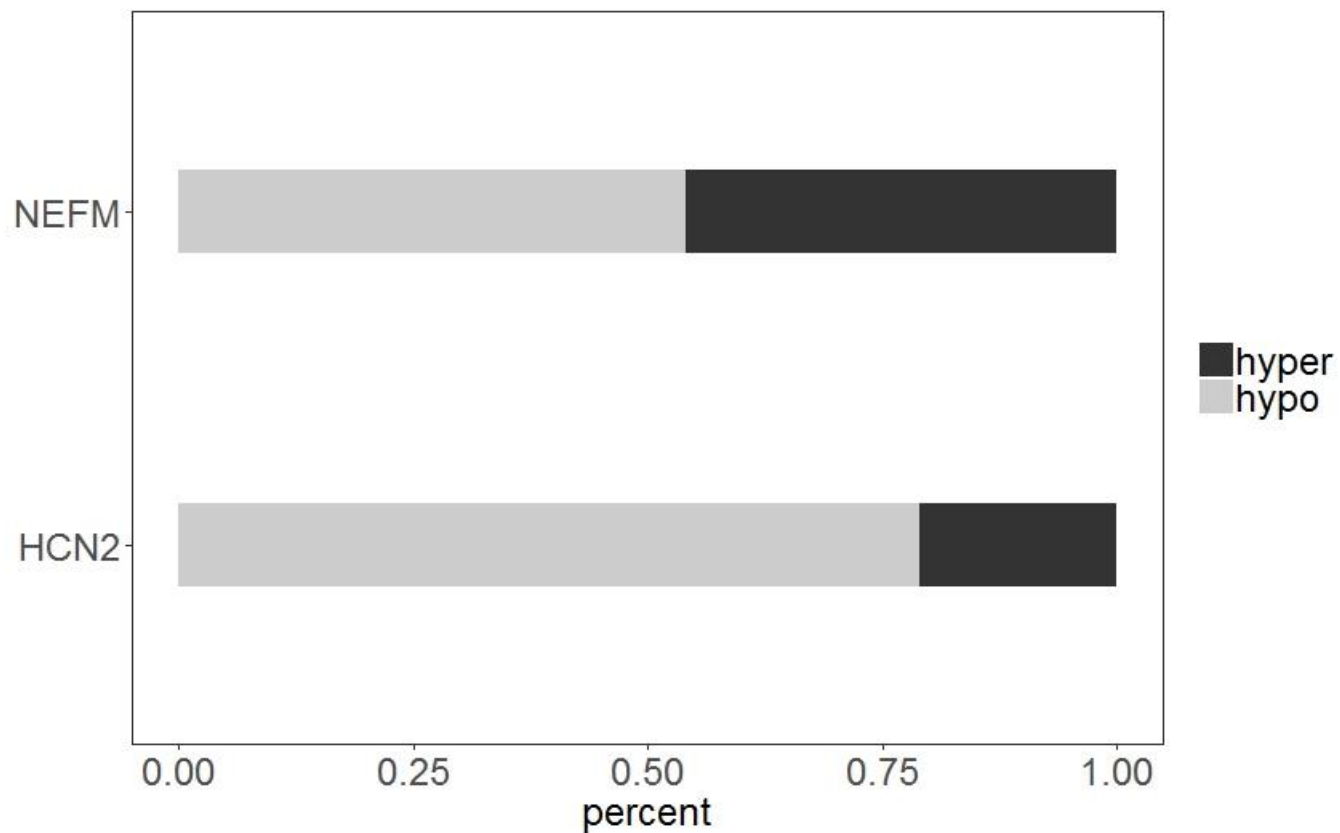

Figure S4. Percentage of hyper and hypo differentially methylated CpGs within DNMT1-dependent loci.
